# Supplementary material for: Reactivity of C,N-chelated organoboron compounds with lithium anilides – formation of unexpected 1,2,3-trisubstituted 1H-2,1-benzazaboroles
Source: Royal Society of Chemistry journal article supplement (doi:10.1039/c3dt32850c), 2013-01-01

**Supplementary materials for:**

**Reactivity of C,N - Chelated Organoboron Compounds with  
Lithium Anilides - Formation of Unexpected  
1,2,3-Trisubstituted 1H-2,1-benzazaboroles.**

**Martin Hejda, Antonín Lyčka, Roman Jambor, Aleš Růžička and Libor Dostál\***

\*Department of General and Inorganic Chemistry, Faculty of Chemical Technology,  
University of Pardubice, Studentská 573, CZ - 532 10, Pardubice, Czech Republic Fax:

+420466037068; Tel: +420466037163; E-mail: [libor.dostal@upce.cz](mailto:libor.dostal@upce.cz)

$^1\text{H}$ ,  $^{10}\text{B}$ ,  $^{13}\text{C}$  and  $^{15}\text{N}$  NMR data ( $\delta$  = [ppm]) of **6** – **11** and **13** in  $\text{C}_6\text{D}_6$  at 298K

\* = signal of carbon not observed

$\delta$  ( $^{13}\text{C}$ ) are given in parenthesis

**a** =  $\delta$  ( $^{10}\text{B}$ ); **b** =  $\delta$  ( $^{15}\text{N}$ )

br. = broad signal

**Compound 6**

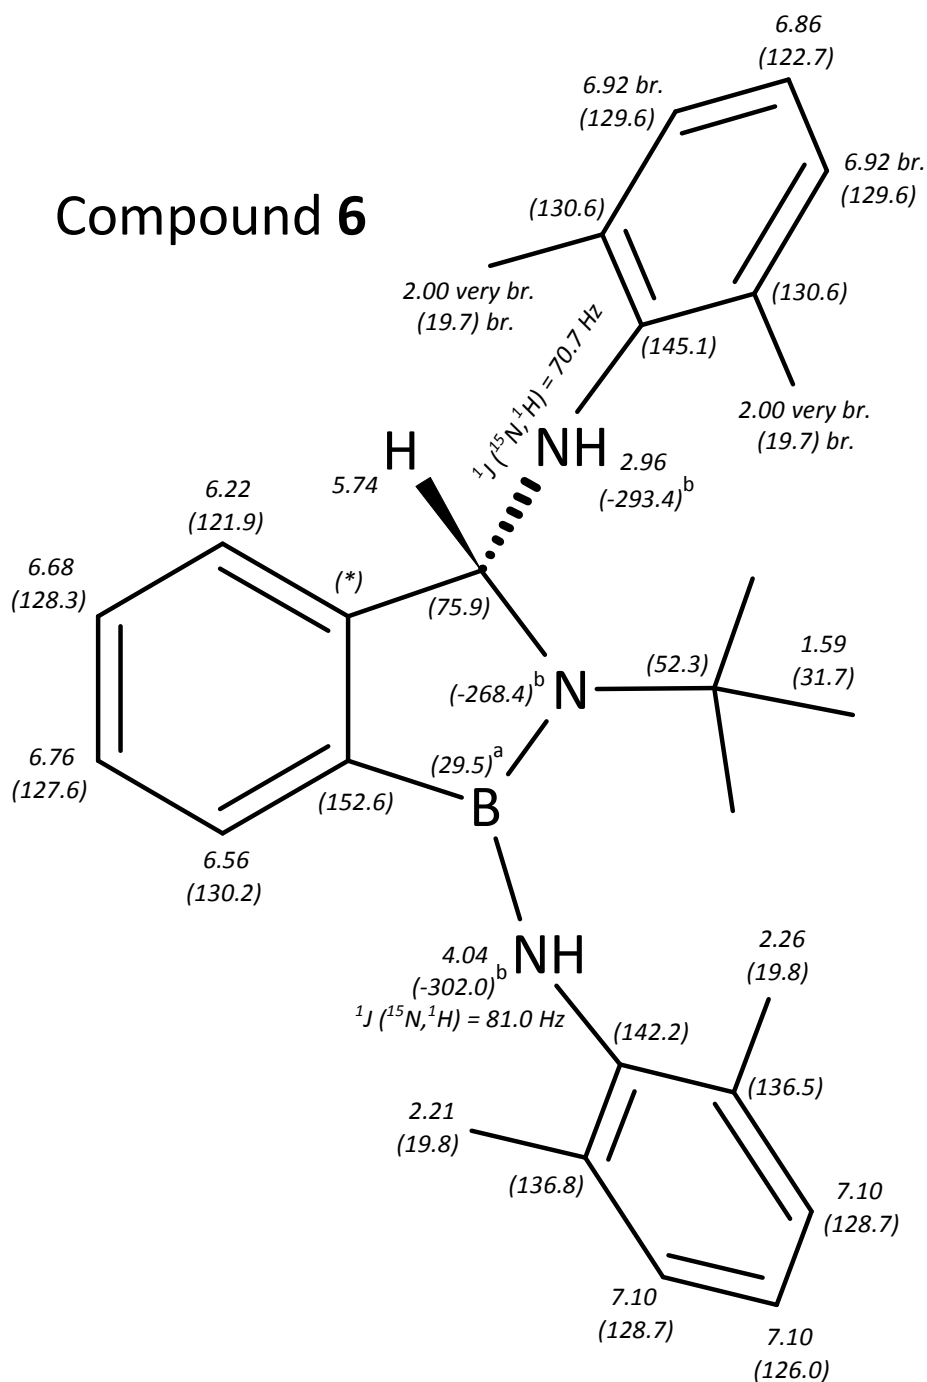



## Compound 8

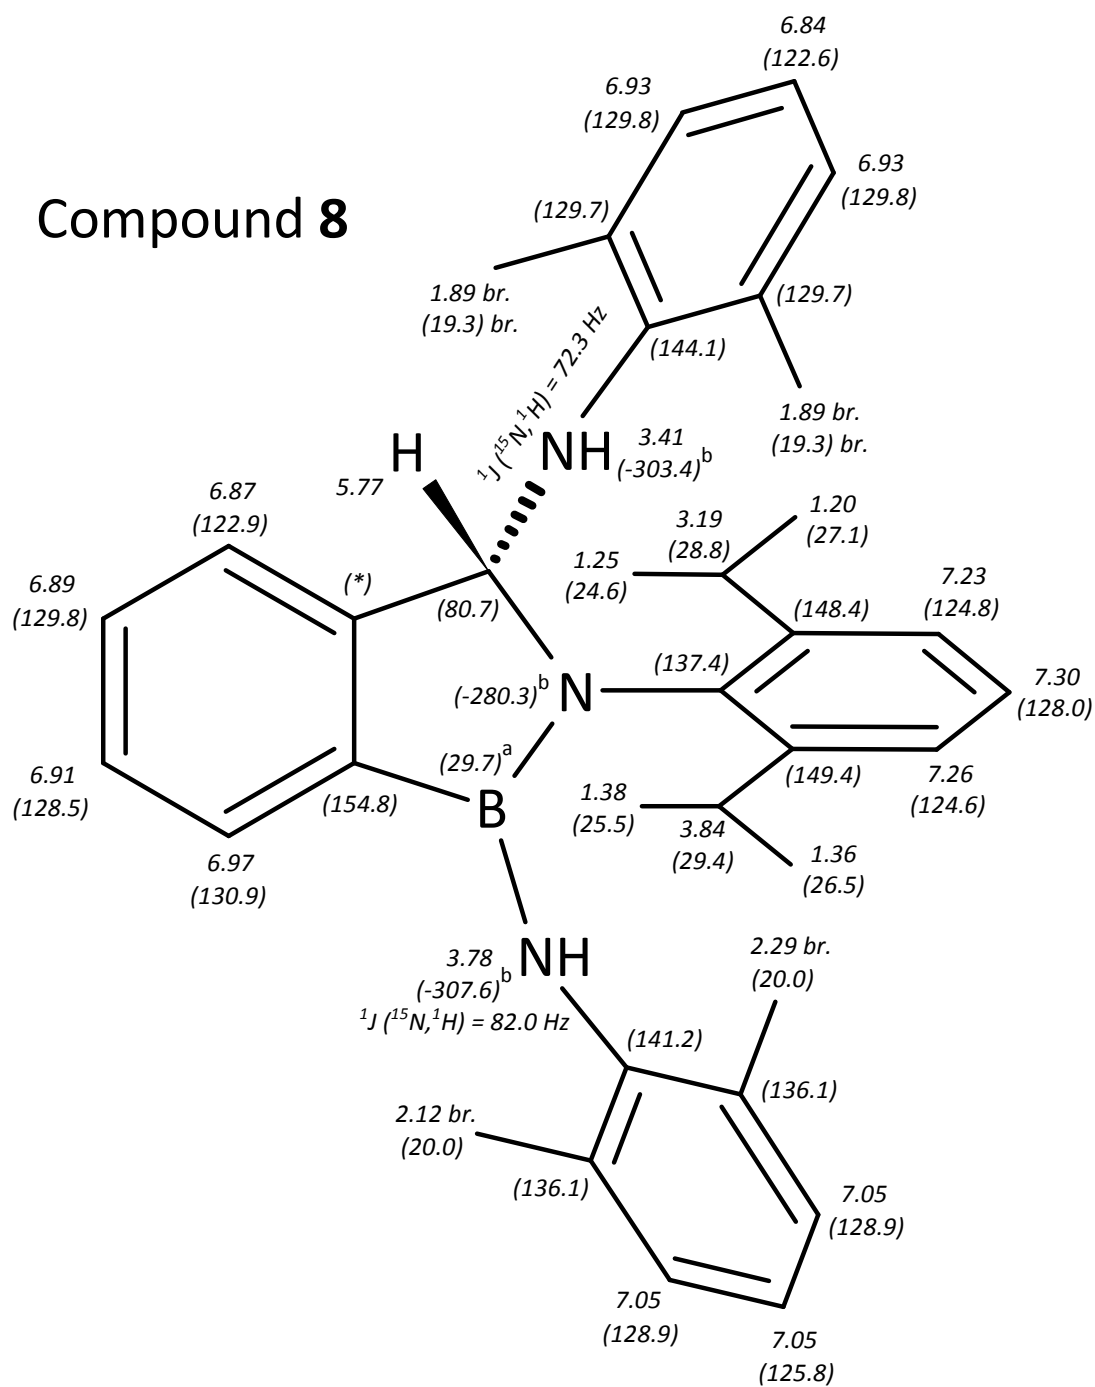

# Compound 9

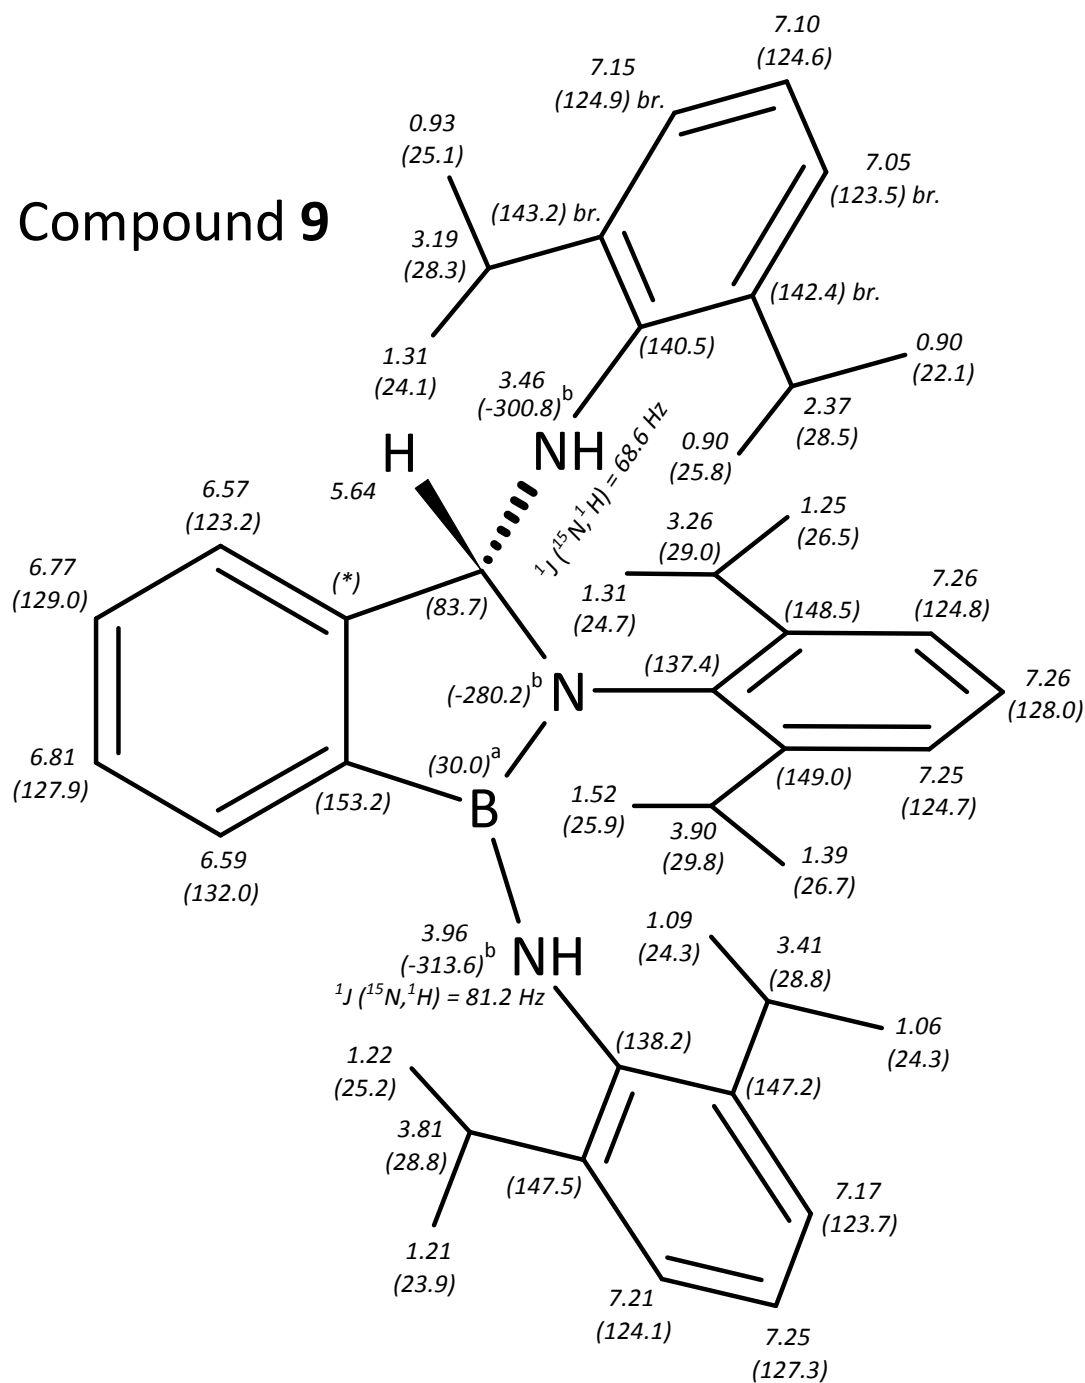

# Compound 10

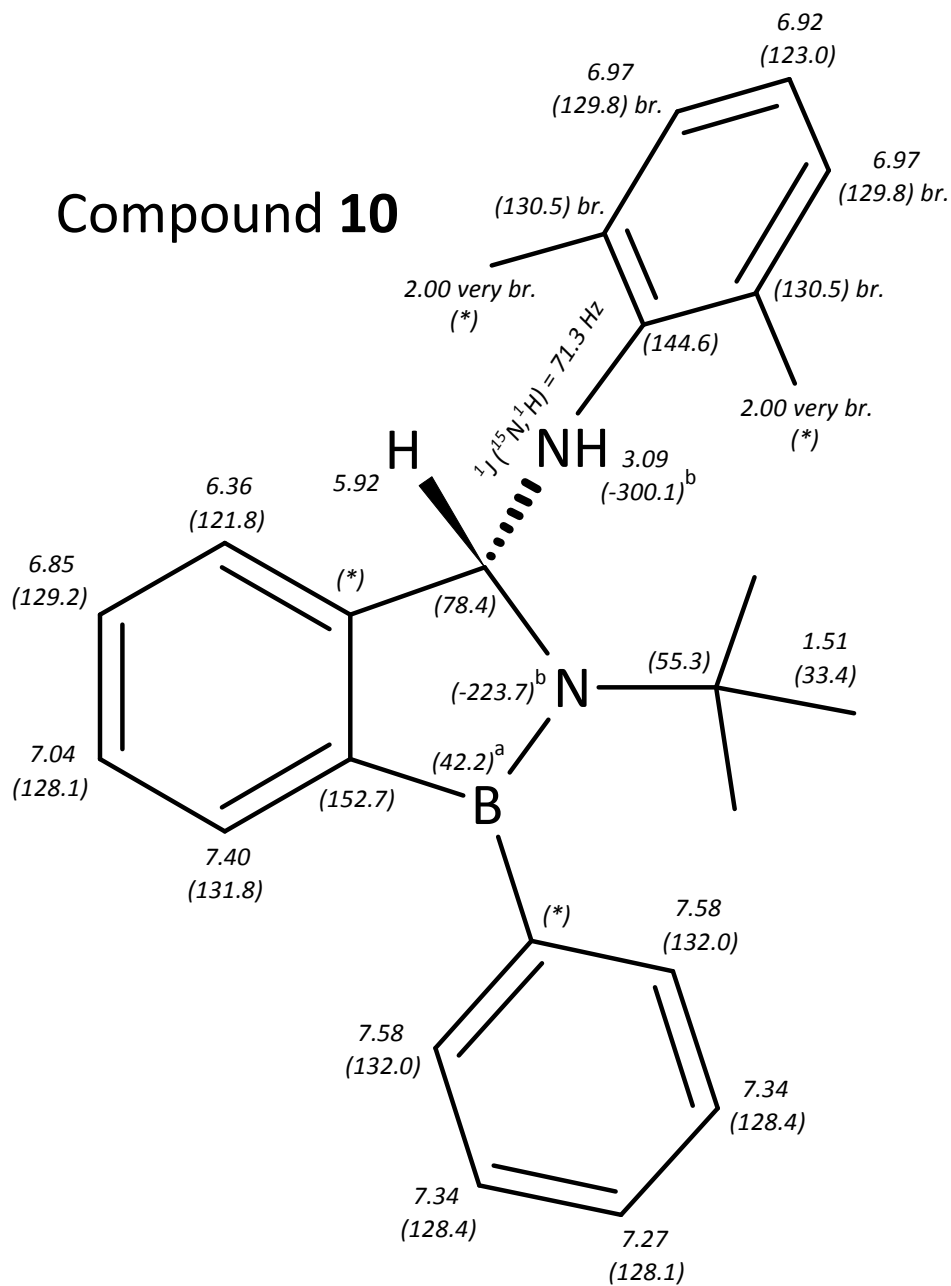



## Compound 13

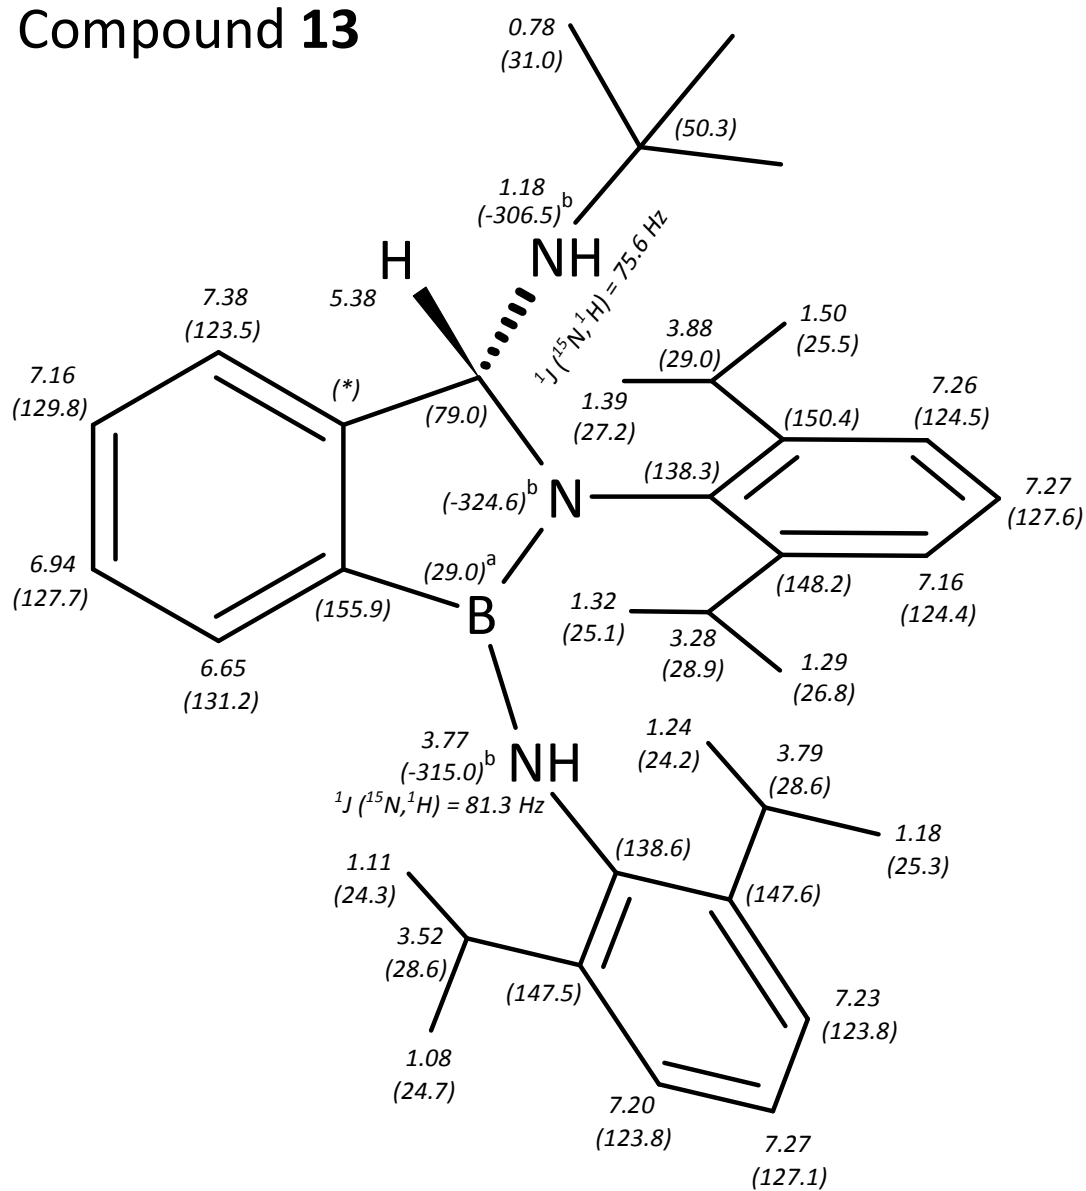

Supplement: c3dt32850c.pdf [file c3dt32850c.pdf]
